# Supplementary material for: Combined Small RNA and Degradome Sequencing Reveals Important Roles of Light-Responsive microRNAs in Wild Potato (Solanum chacoense)
Source: MDPI journal article supplement (doi:10.3390/agronomy13071763), 2023-06-29
Supplement: s1 [file s1]

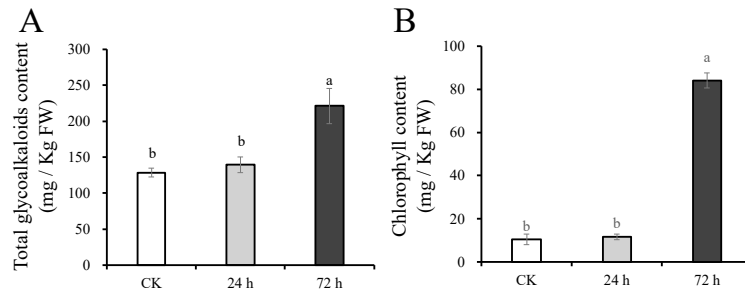

**Supplemental Figure S1.** The total glycoalkaloids (A) and chlorophyll (B) content of *S. chacoense* treated with red light for 0 (CK), 24 and 72 hours. Letters (a and b) indicate significant differences ( $P < 0.05$ ).

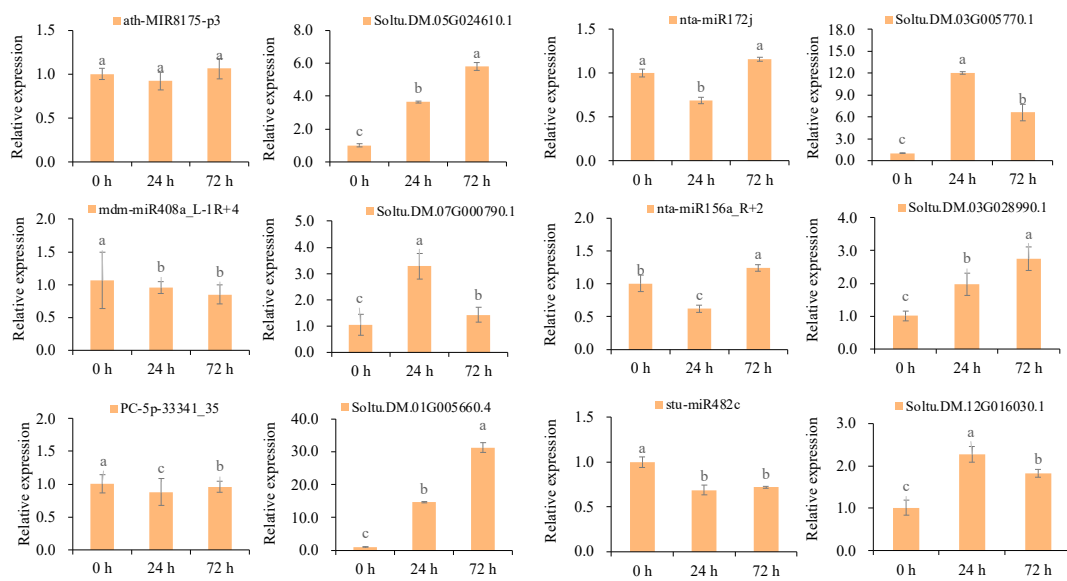

**Supplemental Figure S2.** Validation of degradome sequencing result by qRT-PCR (*18sRNA* gene was used as control). All qRT-PCR results are represented as mean values  $\pm$  SD. Letters (a, b and c) indicate significant differences ( $P < 0.05$ ).
